# Supplementary material for: Antimicrobial Stewardship Programmes in Saudi Hospitals: Evidence from a National Survey
Source: PubMed Central journal article supplement (PMC7923167; doi:10.3390/antibiotics10020193), 2021-02-17
Supplement: antibiotics-10-00193-s001.pdf [file antibiotics-10-00193-s001.pdf]

**Supplementary Materials File**
**Table S1.** Survey responses per geographical region.

| Region          | Number of MOH Hospitals | Number of Participating Hospitals |
|-----------------|-------------------------|-----------------------------------|
| Al-Hasa         | 11                      | 2 (1.3)                           |
| Al-Jouf         | 9                       | 4 (3%)                            |
| Al-Qunfudah     | 5                       | 1 (0.7%)                          |
| Al-Qurayyat     | 5                       | 2 (1.3%)                          |
| Aseer           | 20                      | 13 (9%)                           |
| Baha            | 10                      | 5 (3.5%)                          |
| Bishah          | 7                       | 4 (3%)                            |
| Eastern region  | 19                      | 12 (8%)                           |
| Hafar Al-batin  | 7                       | 5 (3.5%)                          |
| Hail            | 12                      | 3 (2%)                            |
| Jeddah          | 13                      | 10 (7%)                           |
| Jizan           | 21                      | 6 (4%)                            |
| Madinah         | 19                      | 15 (10%)                          |
| Makkah          | 9                       | 5 (3.5%)                          |
| Najran          | 12                      | 9 (6%)                            |
| Northern border | 9                       | 7 (5%)                            |
| Qasim           | 20                      | 12 (8%)                           |
| Riyadh          | 42                      | 21 (14%)                          |
| Tabouk          | 11                      | 8 (5%)                            |
| Taif            | 13                      | 3 (2%)                            |
| Total           | 274                     | 147                               |

**Table S2.** Results of the logistic regression.

| Predictor | B Coefficient | Wald Statistic | Significance |
|-----------|---------------|----------------|--------------|
| TM        | 1.737         | 6.996          | 0.515        |
| PD        | 0.867**       | 4.068          | <b>0.002</b> |
| SMS       | 0.973         | 7.065          | 0.079        |
| OR        | -1.790*       | 5.935          | <b>0.050</b> |
| EP        | 3.751*        | 10.303         | <b>0.029</b> |
| TRI       | -2.180**      | 8.016          | <b>0.013</b> |
| UN        | 1.127**       | 6.424          | <b>0.002</b> |

Goodness-of-fit omnibus  $\chi^2 = 77.987$ ,  $df = 8$ ,  $p < .001$ . TM = Team Members (item 26); PD = (perceived) Patients Demand (items 18 and 21); SMS = Senior Management Support (items 22–25); OR = Organisation Readiness (items 27–30); EP = External Pressure (items 19 and 20); TRI= Trialability (items 37 and 38); UN = Usefulness (39–42) \*  $p < 0.05$  \*\*  $p < 0.01$ .

**Table S3.** Discriminating power.

|          |              | Predicted    |          | % Correct |
|----------|--------------|--------------|----------|-----------|
|          |              | Non-adopters | Adopters |           |
| Observed | Non-adopters | 16           | 1        | 80.0      |
|          | Adopters     | 5            | 99       | 95.2      |
| Overall  |              |              |          | 92.7      |

The research model has an overall predictive accuracy of 92%. Overall, the research model exhibits an acceptable fit with the data.
